# Supplementary material for: Acyl CoA synthetase 5 (ACSL5) ablation in mice increases energy expenditure and insulin sensitivity and delays fat absorption
Source: PubMed Central journal article supplement — Mol Metab. 2016 Jan 11;5(3):210–20. doi: 10.1016/j.molmet.2016.01.001 (PMC4770262; doi:10.1016/j.molmet.2016.01.001), 2016-01-11
Supplement: mmc1.pdf [file mmc1.pdf]

**Table S1. Primer sequences utilized in studies of RNA by real-time RT-PCR.** Sequences 5' to 3' are listed (see methods).

TABLE S1. Primer sequences utilized in studies of RNA by real-time RT-PCR.

| Gene                  | Forward (5' - 3')          | Reverse (5' - 3')         |
|-----------------------|----------------------------|---------------------------|
| <i>Ppar-α</i>         | gagggtgagctcagtcagg        | ggcacctacagtgccatt        |
| <i>Pgc1α</i>          | atgtgcgccttctgtct          | cacgacctgtgtagaaaa        |
| <i>Fabp2</i>          | agaggaagcttgagctcatgaca    | tcgcttgccctcaactcctcata   |
| <i>Fiaf</i>           | caatgccaaattgctccaatt      | tggccgtgggctcagt          |
| <i>Atgl</i>           | acagtgccccattctcagg        | cacatctctcggaggacat       |
| <i>Cpt1α</i>          | ccaggctacagtgggacatt       | gaacttgcccatgctctgt       |
| <i>Acox1</i>          | ggtggtatggtgctgacttga      | gaatcttggggagtattctctgc   |
| <i>Acot1</i>          | cgacctctgttctctgta         | taagggggctcgtatgaatg      |
| <i>Plin2</i>          | aagagaagcatcggctacga       | ggcgatagccagagtacgtg      |
| <i>Scd1</i>           | gaggcctgtacgggatcata       | cagccgagccttgaagttc       |
| <i>Hmgcs2</i>         | cccctgaggaattcacagaa       | tctccattagacgggacacc      |
| <i>Srebp1c</i>        | atctctagagcgagcgttg        | tatttagcaactgcagatatccaag |
| <i>Srebp2</i>         | cacctgtggagcagctcaaa       | tggtaggtctcaccaggag       |
| <i>Hnf4a1</i>         | aaatgtgcaggtgttgacca       | cacgctcctctgaagaacc       |
| <i>Hmgcs</i>          | ttccaagccctgctaagaaa       | tccaagacatccattctc        |
| <i>Hmgcr</i>          | cacctctccgtgggttaaaa       | gaagaagtagggccccaatc      |
| <i>Fgf21</i>          | ctgggggtctaccaagcata       | caccaggatttgaatgacc       |
| <i>Dio2</i>           | gtccgcaaatgaccccttt        | cccaccactctctgacttct      |
| <i>Ucp1</i>           | ggcaaaaacagaaggattgc       | taagccggctgagatctgt       |
| <i>Ucp2</i>           | gggatcctggaacgtagtga       | gcagccattagggctctttt      |
| <i>Adipoq</i>         | gaatcattatgacggcagca       | tcatgtacaccgtgatgtggt     |
| <i>F4/80</i>          | ctttggctatgggcttccagtc     | gcaaggaggacagatttatcgtg   |
| <i>Cyclophyllin B</i> | atgtggttttcggcaaagt        | tgacatccttcagtggcttg      |
| <i>Acs11</i>          | cagaacatggtggtgctccag      | gttaccaacatgggctgctt      |
| <i>Acs13</i>          | gggactacaataccggcaga       | ccgctgtccattttcatctt      |
| <i>Acs14</i>          | ggcaataatggaagcagcag       | tcacaggagatacacctgttctta  |
| <i>Acs15</i>          | aatgtgtcaaaggctacctaaggacc | gcgaccaatgtccccagtgtga    |
| <i>Dgat1</i>          | acggatcattgagcgtctct       | tagaactcgcgggtctccaa      |
| <i>Dgat2</i>          | cgcagcgaaaacaagaataa       | gaagatgtcttgaggggctg      |
| <i>Mgat2</i>          | tcttcagtagcagcttggcctca    | tgatatagcgtgatgaagccggt   |
| <i>Magl</i>           | cagagaggcccacactctttt      | atgcgcccagggtcatattt      |
